# Supplementary material for: Substance Use among Belgian Higher Education Students before and during the First Wave of the COVID-19 Pandemic
Source: MDPI journal article supplement (doi:10.3390/ijerph19074348), 2022-04-05
Supplement: s1 [file s1]

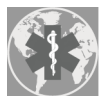

Supplementary 4

## Control analyses

**Table S5.** Multinomial regression analyses for alcohol use: light drinkers (n=11,508) and heavy drinkers (n=1,896)

|                          |                               | Light drinkers            |           |                           |           | Heavy drinkers            |            |                           |           |
|--------------------------|-------------------------------|---------------------------|-----------|---------------------------|-----------|---------------------------|------------|---------------------------|-----------|
|                          |                               | Increase vs.<br>No change |           | Decrease vs.<br>No change |           | Increase vs.<br>No change |            | Decrease vs.<br>No change |           |
|                          |                               | AOR                       | 95% CI    | AOR                       | 95% CI    | AOR                       | 95% CI     | AOR                       | 95% CI    |
| Sex                      | Male                          | 1.00                      |           | 1.00                      |           | 1.00                      |            | 1.00                      |           |
|                          | Female                        | 1.01                      | 0.84-1.20 | 1.01                      | 0.84-1.20 | 1.01                      | 0.84-1.20  | 1.01                      | 0.84-1.20 |
| Age                      |                               | 0.99                      | 0.94-1.04 | 0.83***                   | 0.79-0.86 | 0.92                      | 0.82-1.03  | 0.77***                   | 0.69-0.87 |
| Parent(s) HE degree      | No                            | 1.00                      |           | 1.00                      |           | 1.00                      |            | 1.00                      |           |
|                          | Yes                           | 0.99                      | 0.84-1.16 | 1.03                      | 0.90-1.18 | 0.86                      | 0.57-1.31  | 0.85                      | 0.55-1.33 |
| Study year               | First-year                    | 1.00                      |           | 1.00                      |           | 1.00                      |            | 1.00                      |           |
|                          | Higher year                   | 1.05                      | 0.85-1.30 | 1.08                      | 0.91-1.29 | 0.77                      | 0.43-1.35  | 1.08                      | 0.60-1.96 |
| Institution type         | College of applied sciences   | 1.00                      |           | 1.00                      |           | 1.00                      |            | 1.00                      |           |
|                          | University                    | 0.88                      | 0.76-1.01 | 1.33***                   | 1.18-1.50 | 0.88                      | 0.62-1.25  | 1.17                      | 0.81-1.69 |
| Health condition         | No                            | 1.00                      |           | 1.00                      |           | 1.00                      |            | 1.00                      |           |
|                          | Underlying condition          | 1.17                      | 0.94-1.47 | 1.05                      | 0.86-1.27 | 2.85**                    | 1.42-5.73  | 2.22*                     | 1.07-4.61 |
| COVID-19 diagnosis       | No                            | 1.00                      |           | 1.00                      |           | 1.00                      |            | 1.00                      |           |
|                          | (Un)confirmed probably or yes | 0.95                      | 0.76-1.18 | 1.05                      | 0.88-1.26 | 0.78                      | 0.50-1.21  | 0.82                      | 0.52-1.31 |
| Living situation         | Parental home                 | 1.00                      |           | 1.00                      |           | 1.00                      |            | 1.00                      |           |
|                          | Moved back to parental home   | 0.90                      | 0.77-1.06 | 1.89***                   | 1.66-2.15 | 0.71                      | 0.49-1.04  | 1.34                      | 0.91-1.98 |
|                          | Outside of parental home      | 0.86                      | 0.69-1.07 | 1.06                      | 0.88-1.27 | 0.80                      | 0.52-1.22  | 0.84                      | 0.54-1.33 |
|                          | Moved away from parental home | 1.21                      | 0.79-1.85 | 0.95                      | 0.65-1.40 | 3.43*                     | 1.04-11.33 | 1.92                      | 0.54-6.83 |
| Financial situation      | No change                     | 1.00                      |           | 1.00                      |           | 1.00                      |            | 1.00                      |           |
|                          | Decrease                      | 1.20*                     | 1.03-1.41 | 1.11                      | 0.98-1.27 | 1.30                      | 0.90-1.89  | 1.06                      | 0.71-1.57 |
|                          | Increase                      | 1.22                      | 0.87-1.72 | 1.56**                    | 1.18-2.06 | 0.70                      | 0.39-1.28  | 0.81                      | 0.44-1.50 |
| Social activity          |                               | 0.98                      | 0.94-1.02 | 1.08***                   | 1.04-1.12 | 0.93                      | 0.84-1.02  | 1.06                      | 0.96-1.16 |
| Perceived threat         |                               | 1.02                      | 0.98-1.07 | 0.97                      | 0.94-1.01 | 0.99                      | 0.90-1.10  | 0.89*                     | 0.80-0.99 |
| Academic stress          |                               | 1.05                      | 0.95-1.16 | 0.92                      | 0.85-1.00 | 1.04                      | 0.83-1.30  | 0.86                      | 0.68-1.08 |
| Academic dissatisfaction |                               | 0.99                      | 0.89-1.09 | 1.12*                     | 1.02-1.22 | 1.04                      | 0.82-1.31  | 1.06                      | 0.82-1.36 |
| Depressive symptoms      |                               | 1.05***                   | 1.03-1.07 | 1.04***                   | 1.03-1.06 | 1.07***                   | 1.03-1.11  | 1.03                      | 0.99-1.07 |

\*\*\*  $p < .001$ ; \*\*  $p < .01$ ; \*  $p < .05$

Results in italics are biased estimates and should be ignored.

**Table S6.** Multinomial regression analyses for binge drinking: light bingers (n=9,826) and heavy bingers (n=938)

|                          |                               | Light bingers             |           |                           |           | Heavy bingers             |           |                           |           |
|--------------------------|-------------------------------|---------------------------|-----------|---------------------------|-----------|---------------------------|-----------|---------------------------|-----------|
|                          |                               | Increase vs.<br>No change |           | Decrease vs.<br>No change |           | Increase vs.<br>No change |           | Decrease vs.<br>No change |           |
|                          |                               | AOR                       | 95% CI    |
| Sex                      | Male                          | 1.00                      |           | 1.00                      |           | 1.00                      |           | 1.00                      |           |
|                          | Female                        | 0.70                      | 0.43-1.12 | 0.83                      | 0.66-1.04 | 1.50*                     | 1.06-2.13 | 0.66*                     | 0.44-0.99 |
| Age                      |                               | 1.06                      | 0.91-1.22 | 0.82***                   | 0.77-0.88 | 1.13*                     | 1.01-1.27 | 0.91                      | 0.79-1.05 |
| Parent(s) HE degree      | No                            | 1.00                      |           | 1.00                      |           | 1.00                      |           | 1.00                      |           |
|                          | Yes                           | 1.42                      | 0.89-2.27 | 1.22                      | 0.99-1.51 | 0.84                      | 0.56-1.26 | 0.81                      | 0.49-1.32 |
| Study year               | First-year                    | 1.00                      |           | 1.00                      |           | 1.00                      |           | 1.00                      |           |
|                          | Higher year                   | 0.91                      | 0.50-1.67 | 1.33                      | 1.00-1.76 | 0.78                      | 0.48-1.26 | 1.83*                     | 1.01-3.31 |
| Institution type         | College of applied sciences   | 1.00                      |           | 1.00                      |           | 1.00                      |           | 1.00                      |           |
|                          | University                    | 0.72                      | 0.47-1.09 | 1.36**                    | 1.12-1.66 | 0.87                      | 0.61-1.23 | 1.03                      | 0.68-1.55 |
| Health condition         | No                            | 1.00                      |           | 1.00                      |           | 1.00                      |           | 1.00                      |           |
|                          | Underlying condition          | 1.11                      | 0.62-1.99 | 0.84                      | 0.63-1.12 | 1.03                      | 0.63-1.67 | 0.83                      | 0.45-1.54 |
| COVID-19 diagnosis       | No                            | 1.00                      |           | 1.00                      |           | 1.00                      |           | 1.00                      |           |
|                          | (Un)confirmed probably or yes | 0.89                      | 0.47-1.67 | 1.12                      | 0.84-1.50 | 0.95                      | 0.59-1.52 | 0.84                      | 0.47-1.49 |
| Living situation         | Parental home                 | 1.00                      |           | 1.00                      |           | 1.00                      |           | 1.00                      |           |
|                          | Moved back to parental home   | 0.99                      | 0.59-1.65 | 1.69***                   | 1.35-2.12 | 0.74                      | 0.49-1.10 | 1.21                      | 0.77-1.90 |
|                          | Outside of parental home      | 1.07                      | 0.62-1.86 | 0.66**                    | 0.51-0.86 | 1.22                      | 0.79-1.90 | 1.11                      | 0.66-1.89 |
|                          | Moved away from parental home | 1.83                      | 0.75-4.43 | 0.63                      | 0.38-1.04 | 2.18                      | 0.88-5.42 | 0.37                      | 0.07-1.84 |
| Financial situation      | No change                     | 1.00                      |           | 1.00                      |           | 1.00                      |           | 1.00                      |           |
|                          | Decrease                      | 1.36                      | 0.89-2.09 | 0.75**                    | 0.61-0.92 | 1.14                      | 0.79-1.62 | 0.78                      | 0.50-1.22 |
|                          | Increase                      | 1.41                      | 0.57-3.45 | 1.12                      | 0.73-1.73 | 1.67                      | 0.82-3.36 | 1.07                      | 0.49-2.36 |
| Social activity          | Median                        | 1.00                      |           | 1.00                      |           | 1.00                      |           | 1.00                      |           |
|                          | Below median                  | 1.97*                     | 1.11-3.50 | 1.18                      | 0.94-1.49 | 0.78                      | 0.49-1.22 | 0.55*                     | 0.31-0.95 |
|                          | Above median                  | 1.80                      | 0.99-3.29 | 1.10                      | 0.86-1.39 | 0.56*                     | 0.36-0.89 | 0.96                      | 0.57-1.60 |
| Perceived threat         |                               | 1.00                      | 0.88-1.13 | 0.96                      | 0.90-1.02 | 1.13*                     | 1.03-1.24 | 1.04                      | 0.93-1.16 |
| Academic stress          |                               | 1.19                      | 0.87-1.64 | 0.92                      | 0.80-1.05 | 1.29*                     | 1.01-1.66 | 0.92                      | 0.70-1.22 |
| Academic dissatisfaction |                               | 1.09                      | 0.82-1.46 | 1.07                      | 0.93-1.23 | 0.82                      | 0.64-1.06 | 1.08                      | 0.81-1.44 |
| Depressive symptoms      |                               | 1.07**                    | 1.02-1.12 | 1.01                      | 0.99-1.03 | 1.09***                   | 1.05-1.13 | 1.03                      | 0.99-1.07 |

\*\*\* p &lt; .001; \*\* p &lt; .01; \* p &lt; .05

Results in italics are biased estimates and should be ignored.

**Table S7.** Multinomial regression analyses for tobacco use: low-rate daily smokers (n=2,038) and high-rate daily smokers (n=615)

|                          |                               | Low-rate daily smokers    |           |                           |           | High-rate daily smokers   |           |                           |            |
|--------------------------|-------------------------------|---------------------------|-----------|---------------------------|-----------|---------------------------|-----------|---------------------------|------------|
|                          |                               | Increase vs.<br>No change |           | Decrease vs.<br>No change |           | Increase vs.<br>No change |           | Decrease vs.<br>No change |            |
|                          |                               | AOR                       | 95% CI     |
| Sex                      | Male                          | 1.00                      |           | 1.00                      |           | 1.00                      |           | 1.00                      |            |
|                          | Female                        | 0.69*                     | 0.51-0.93 | 1.08                      | 0.86-1.34 | 1.96**                    | 1.23-3.12 | 1.32                      | 0.66-2.62  |
| Age                      |                               | 1.10*                     | 1.00-1.22 | 1.13***                   | 1.05-1.21 | 0.89                      | 0.77-1.03 | 0.90                      | 0.73-1.13  |
| Parent(s) HE degree      | No                            | 1.00                      |           | 1.00                      |           | 1.00                      |           | 1.00                      |            |
|                          | Yes                           | 0.62**                    | 0.44-0.87 | 0.95                      | 0.73-1.23 | 1.00                      | 0.63-1.58 | 1.64                      | 0.79-3.42  |
| Study year               | First-year                    | 1.00                      |           | 1.00                      |           | 1.00                      |           | 1.00                      |            |
|                          | Higher year                   | 0.78                      | 0.52-1.15 | 0.86                      | 0.65-1.13 | 0.58                      | 0.29-1.15 | 0.73                      | 0.27-1.99  |
| Institution type         | College of applied sciences   | 0.00                      |           | 1.00                      |           | 1.00                      |           | 1.00                      |            |
|                          | University                    | 0.67**                    | 0.50-0.90 | 0.61***                   | 0.50-0.76 | 0.97                      | 0.62-1.52 | 0.77                      | 0.40-1.51  |
| Health condition         | No                            | 1.00                      |           | 1.00                      |           | 1.00                      |           | 1.00                      |            |
|                          | Underlying condition          | 1.16                      | 0.75-1.80 | 0.90                      | 0.64-1.26 | 1.04                      | 0.58-1.86 | 1.16                      | 0.50-2.70  |
| COVID-19 diagnosis       | No                            | 1.00                      |           | 1.00                      |           | 1.00                      |           | 1.00                      |            |
|                          | (Un)confirmed probably or yes | 1.59*                     | 1.09-2.32 | 1.14                      | 0.85-1.53 | 1.00                      | 0.54-1.82 | 1.08                      | 0.46-2.58  |
| Living situation         | Parental home                 | 1.00                      |           | 1.00                      |           | 1.00                      |           | 1.00                      |            |
|                          | Moved back to parental home   | 0.59**                    | 0.41-0.83 | 1.06                      | 0.85-1.32 | 0.69                      | 0.40-1.21 | 1.13                      | 0.51-2.53  |
|                          | Outside of parental home      | 2.39***                   | 1.65-3.46 | 0.72*                     | 0.53-0.98 | 0.91                      | 0.53-1.55 | 1.05                      | 0.45-2.42  |
|                          | Moved away from parental home | 1.43                      | 0.65-3.15 | 0.75                      | 0.40-1.40 | 0.45                      | 0.17-1.18 | 1.39                      | 0.39-4.89  |
| Financial situation      | No change                     | 1.00                      |           | 1.00                      |           | 1.00                      |           | 1.00                      |            |
|                          | Decrease                      | 1.30                      | 0.96-1.77 | 1.65***                   | 1.32-2.06 | 1.22                      | 0.78-1.90 | 1.07                      | 0.54-2.13  |
|                          | Increase                      | 0.83                      | 0.45-1.52 | 2.01***                   | 1.39-2.91 | 1.64                      | 0.62-4.33 | 4.03                      | 1.28-12.65 |
| Social activity          |                               | 1.05                      | 0.96-1.14 | 1.00                      | 0.94-1.06 | 0.96                      | 0.85-1.08 | 0.99                      | 0.82-1.19  |
| Perceived threat         |                               | 1.07                      | 0.99-1.16 | 1.08**                    | 1.02-1.15 | 1.03                      | 0.91-1.17 | 1.01                      | 0.83-1.22  |
| Academic stress          |                               | 1.41**                    | 1.14-1.74 | 1.10                      | 0.96-1.27 | 1.03                      | 0.77-1.38 | 0.97                      | 0.63-1.49  |
| Academic dissatisfaction |                               | 0.82                      | 0.67-1.01 | 0.98                      | 0.84-1.13 | 1.18                      | 0.87-1.58 | 1.33                      | 0.86-2.05  |
| Depressive symptoms      |                               | 1.05**                    | 1.02-1.09 | 1.00                      | 0.98-1.03 | 1.05*                     | 1.01-1.10 | 0.99                      | 0.93-1.06  |

\*\*\* p &lt; .001; \*\* p &lt; .01; \* p &lt; .05

Results in italics are biased estimates and should be ignored.

**Table S8.** Multinomial regression analyses for cannabis use: light cannabis users (n=1,212) and heavy cannabis users (n=592)

|                          |                               | Light cannabis users      |           |                           |           | Heavy cannabis users      |           |                           |           |
|--------------------------|-------------------------------|---------------------------|-----------|---------------------------|-----------|---------------------------|-----------|---------------------------|-----------|
|                          |                               | Increase vs.<br>No change |           | Decrease vs.<br>No change |           | Increase vs.<br>No change |           | Decrease vs.<br>No change |           |
|                          |                               | AOR                       | 95% CI    |
| Sex                      | Male                          | 1.00                      |           | 1.00                      |           | 1.00                      |           | 1.00                      |           |
|                          | Female                        | 1.03                      | 0.52-2.05 | 0.54*                     | 0.34-0.87 | 1.63*                     | 1.10-2.40 | 0.60                      | 0.29-1.25 |
| Age                      |                               | 0.98                      | 0.80-1.20 | 0.89                      | 0.77-1.03 | 1.02                      | 0.90-1.16 | 0.89                      | 0.70-1.13 |
| Parent(s) HE degree      | No                            | 1.00                      |           | 1.00                      |           | 1.00                      |           | 1.00                      |           |
|                          | Yes                           | 0.77                      | 0.37-1.61 | 0.56*                     | 0.33-0.96 | 0.91                      | 0.59-1.39 | 1.92                      | 0.74-4.99 |
| Study year               | First-year                    | 1.00                      |           | 1.00                      |           | 1.00                      |           | 1.00                      |           |
|                          | Higher year                   | 1.29                      | 0.55-3.06 | 1.30                      | 0.71-2.36 | 1.01                      | 0.60-1.70 | 1.17                      | 0.47-2.89 |
| Institution type         | College of applied sciences   | 1.00                      |           | 1.00                      |           | 1.00                      |           | 1.00                      |           |
|                          | University                    | 1.02                      | 0.57-1.85 | 1.60                      | 1.04-2.44 | 1.22                      | 0.84-1.77 | 1.41                      | 0.71-2.80 |
| Health condition         | No                            | 1.00                      |           | 1.00                      |           | 1.00                      |           | 1.00                      |           |
|                          | Underlying condition          | 0.81                      | 0.30-2.15 | 1.17                      | 0.59-2.31 | 0.93                      | 0.52-1.66 | 1.34                      | 0.49-3.69 |
| COVID-19 diagnosis       | No                            | 1.00                      |           | 1.00                      |           | 1.00                      |           | 1.00                      |           |
|                          | (Un)confirmed probably or yes | 1.05                      | 0.49-2.27 | 0.98                      | 0.56-1.73 | 1.29                      | 0.77-2.16 | 1.41                      | 0.60-3.36 |
| Living situation         | Parental home                 | 1.00                      |           | 1.00                      |           | 1.00                      |           | 1.00                      |           |
|                          | Moved back to parental home   | 1.00                      | 0.47-2.10 | 2.17**                    | 1.28-3.68 | 1.06                      | 0.65-1.75 | 2.43*                     | 1.04-5.70 |
|                          | Outside of parental home      | 0.64                      | 0.31-1.32 | 0.37***                   | 0.22-0.62 | 1.32                      | 0.84-2.09 | 1.86                      | 0.76-4.52 |
|                          | Moved away from parental home | 0.37                      | 0.07-1.98 | 0.23**                    | 0.08-0.66 | 1.79                      | 0.74-4.35 | 0.86                      | 0.10-7.75 |
| Financial situation      | No change                     | 1.00                      |           | 1.00                      |           | 1.00                      |           | 1.00                      |           |
|                          | Decrease                      | 1.48                      | 0.80-2.74 | 1.04                      | 0.66-1.64 | 1.05                      | 0.71-1.56 | 1.02                      | 0.50-2.11 |
|                          | Increase                      | 0.98                      | 0.30-3.24 | 1.46                      | 0.66-3.23 | 0.30**                    | 0.14-0.63 | 0.56                      | 0.15-2.09 |
| Social activity          |                               | 0.96                      | 0.80-1.15 | 1.01                      | 0.89-1.15 | 1.08                      | 0.97-1.20 | 1.02                      | 0.84-1.23 |
| Perceived threat         |                               | 1.10                      | 0.92-1.31 | 0.88*                     | 0.78-1.00 | 1.03                      | 0.92-1.14 | 0.99                      | 0.82-1.19 |
| Academic stress          |                               | 0.77                      | 0.51-1.16 | 0.80                      | 0.60-1.09 | 1.08                      | 0.83-1.42 | 1.40                      | 0.82-2.37 |
| Academic dissatisfaction |                               | 0.99                      | 0.65-1.50 | 0.93                      | 0.69-1.25 | 1.12                      | 0.86-1.47 | 1.03                      | 0.64-1.68 |
| Depressive symptoms      |                               | 1.03                      | 0.96-1.10 | 1.04                      | 0.99-1.09 | 1.06**                    | 1.02-1.11 | 1.03                      | 0.96-1.11 |

\*\*\* p &lt; .001; \*\* p &lt; .01; \* p &lt; .05

Results in italics are biased estimates and should be ignored.
