# Supplementary material for: Substance Use among Belgian Higher Education Students before and during the First Wave of the COVID-19 Pandemic
Source: MDPI journal article supplement (doi:10.3390/ijerph19074348), 2022-04-05
Supplement: s1 [file s1]

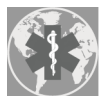

Supplementary 1

# Bivariate analyses

**Table S1.** Bivariate analyses for alcohol use (N=13,404)

| Variable                                 | Values                        | Increase<br>N=3,043   | No change<br>N=1,696  | Decrease<br>N=8,665   | Chi-square                          | Effect<br>size   |
|------------------------------------------|-------------------------------|-----------------------|-----------------------|-----------------------|-------------------------------------|------------------|
| Sex                                      | Male                          | 23%                   | 22%                   | 28%                   | $\chi^2(2) = 41.262^{***}$          | $\phi_c = 0.055$ |
|                                          | Female                        | 77%                   | 78%                   | 72%                   |                                     |                  |
| Age <sup>1</sup>                         | 17-24                         | 21 (20 ; 22)          | 21 (20 ; 22)          | 20 (19 ; 22)          | $\chi^2(2) = 261.471^{***}$         | $\eta^2 = 0.018$ |
| Parent(s) HE de-<br>gree                 | No                            | 26%                   | 24%                   | 21%                   | $\chi^2(2) = 25.727^{***}$          | $\phi_c = 0.044$ |
|                                          | Yes                           | 74%                   | 76%                   | 79%                   |                                     |                  |
| Study year                               | First-year                    | 18%                   | 17%                   | 23%                   | $\chi^2(2) = 52.084^{***}$          | $\phi_c = 0.062$ |
|                                          | Higher year                   | 82%                   | 83%                   | 77%                   |                                     |                  |
| Institution type                         | College of applied sciences   | 44%                   | 41%                   | 35%                   | $\chi^2(2) = 84.867^{***}$          | $\phi_c = 0.080$ |
|                                          | University                    | 56%                   | 59%                   | 65%                   |                                     |                  |
| Health condition                         | No                            | 88%                   | 91%                   | 90%                   | $\chi^2(2) = 21.683^{***}$          | $\phi_c = 0.040$ |
|                                          | Underlying condition          | 12%                   | 9%                    | 10%                   |                                     |                  |
| COVID-19 diag-<br>nosis                  | No                            | 88%                   | 88%                   | 88%                   | $\chi^2(2) = 0.384,$<br>$p = 0.825$ | $\phi_c = 0.005$ |
|                                          | (Un)confirmed probably or yes | 12%                   | 12%                   | 12%                   |                                     |                  |
| Living situation                         | Parental home                 | 56%                   | 56%                   | 47%                   | $\chi^2(6) = 337.665^{***}$         | $\phi_c = 0.112$ |
|                                          | Moved back to parental home   | 25%                   | 27%                   | 41%                   |                                     |                  |
|                                          | Outside of parental home      | 15%                   | 15%                   | 10%                   |                                     |                  |
|                                          | Moved away from parental home | 4%                    | 2%                    | 2%                    |                                     |                  |
| Financial situa-<br>tion                 | Decrease                      | 34%                   | 26%                   | 26%                   | $\chi^2(4) = 77.952^{***}$          | $\phi_c = 0.054$ |
|                                          | No change                     | 61%                   | 70%                   | 68%                   |                                     |                  |
|                                          | Increase                      | 5%                    | 4%                    | 6%                    |                                     |                  |
| Social activity <sup>1</sup>             | 0-9                           | 5 (3 ; 6)             | 5 (4 ; 6)             | 5 (4 ; 6)             | $\chi^2(2) = 18.375^{***}$          | $\eta^2 = 0.003$ |
| Perceived threat <sup>1</sup>            | 0-10                          | 5.83<br>(4.67 ; 7.00) | 5.67<br>(4.50 ; 6.83) | 5.60<br>(4.50 ; 6.67) | $\chi^2(2) = 54.919^{***}$          | $\eta^2 = 0.011$ |
| Academic stress <sup>1</sup>             | 0-4                           | 3.00<br>(2.50 ; 3.75) | 3.00<br>(2.25 ; 3.50) | 3.00<br>(2.25 ; 3.50) | $\chi^2(2) = 46.212^{***}$          | $\eta^2 = 0.003$ |
| Academic<br>dissatisfaction <sup>1</sup> | 0-4                           | 2.00<br>(1.50 ; 2.50) | 2.00<br>(1.25 ; 2.25) | 2.00<br>(1.50 ; 2.50) | $\chi^2(2) = 23.793^{***}$          | $\eta^2 = 0.001$ |
| Depressive<br>symptoms <sup>1</sup>      | 0-24                          | 11 (7 ; 15)           | 9 (6 ; 13)            | 10 (7 ; 14)           | $\chi^2(2) = 107.981^{***}$         | $\eta^2 = 0.004$ |

\*\*\*  $p < .001$ ; \*\*  $p < .01$ ; \*  $p < .05$ ;  $\phi_c$  = Cramer's V;  $\eta^2$  = Eta squared

<sup>1</sup> Median, 25th percentile and 75th percentile (Tukey's hinges)

**Table S2.** Bivariate analyses for binge drinking (N=10,764)

| Variable                              | Values                        | Increase<br>N=621     | No change<br>N=738    | Decrease<br>N=9,405   | Chi-square                           | Effect<br>size   |
|---------------------------------------|-------------------------------|-----------------------|-----------------------|-----------------------|--------------------------------------|------------------|
| Sex                                   | Male                          | 30%                   | 30%                   | 28%                   | $\chi^2(2) = 2.139$ ,<br>$p = 0.343$ | $\phi_c = 0.014$ |
|                                       | Female                        | 70%                   | 70%                   | 72%                   |                                      |                  |
| Age <sup>1</sup>                      | 17-24                         | 21 (20 ; 23)          | 21 (20 ; 22)          | 20 (19 ; 22)          | $\chi^2(2) = 114.811^{***}$          | $\eta^2 = 0.011$ |
| Parent(s) HE degree                   | No                            | 27%                   | 26%                   | 22%                   | $\chi^2(2) = 16.115^{***}$           | $\phi_c = 0.039$ |
|                                       | Yes                           | 73%                   | 74%                   | 78%                   |                                      |                  |
| Study year                            | First-year                    | 21%                   | 20%                   | 22%                   | $\chi^2(2) = 2.131$ ,<br>$p = 0.345$ | $\phi_c = 0.014$ |
|                                       | Higher year                   | 79%                   | 80%                   | 78%                   |                                      |                  |
| Institution type                      | College of applied sciences   | 46%                   | 43%                   | 36%                   | $\chi^2(2) = 40.076^{***}$           | $\phi_c = 0.061$ |
|                                       | University                    | 54%                   | 57%                   | 64%                   |                                      |                  |
| Health condition                      | No                            | 85%                   | 88%                   | 90%                   | $\chi^2(2) = 19.719^{***}$           | $\phi_c = 0.043$ |
|                                       | Underlying condition          | 15%                   | 12%                   | 10%                   |                                      |                  |
| COVID-19 diagnosis                    | No                            | 86%                   | 88%                   | 88%                   | $\chi^2(2) = 2.457$ ,<br>$p = 0.293$ | $\phi_c = 0.015$ |
|                                       | (Un)confirmed probably or yes | 14%                   | 12%                   | 12%                   |                                      |                  |
| Living situation                      | Parental home                 | 47%                   | 51%                   | 50%                   | $\chi^2(6) = 265.028^{***}$          | $\phi_c = 0.111$ |
|                                       | Moved back to parental home   | 23%                   | 25%                   | 38%                   |                                      |                  |
|                                       | Outside of parental home      | 24%                   | 20%                   | 10%                   |                                      |                  |
|                                       | Moved away from parental home | 6%                    | 4%                    | 2%                    |                                      |                  |
| Financial situation                   | Decrease                      | 44%                   | 36%                   | 27%                   | $\chi^2(4) = 113.151^{***}$          | $\phi_c = 0.072$ |
|                                       | No change                     | 50%                   | 59%                   | 67%                   |                                      |                  |
|                                       | Increase                      | 6%                    | 5%                    | 6%                    |                                      |                  |
| Social activity                       | Below median                  | 46%                   | 40%                   | 44%                   | $\chi^2(4) = 7.897$ ,<br>$p = 0.095$ | $\phi_c = 0.019$ |
|                                       | Median                        | 20%                   | 23%                   | 23%                   |                                      |                  |
|                                       | Above median                  | 34%                   | 37%                   | 33%                   |                                      |                  |
| Perceived threat <sup>1</sup>         | 0-10                          | 5.83<br>(4.67 ; 7.17) | 5.50<br>(4.50 ; 6.83) | 5.67<br>(4.50 ; 6.67) | $\chi^2(2) = 18.514^{***}$           | $\eta^2 = 0.002$ |
| Academic stress <sup>1</sup>          | 0-4                           | 3.50<br>(2.75 ; 4.00) | 3.00<br>(2.50 ; 3.50) | 3.00<br>(2.50 ; 3.50) | $\chi^2(2) = 71.094^{***}$           | $\eta^2 = 0.006$ |
| Academic dissatisfaction <sup>1</sup> | 0-4                           | 2.00<br>(1.50 ; 2.75) | 2.00<br>(1.50 ; 2.50) | 2.00<br>(1.50 ; 2.50) | $\chi^2(2) = 34.193^{***}$           | $\eta^2 = 0.004$ |
| Depressive symptoms <sup>1</sup>      | 0-24                          | 13 (9 ; 17)           | 10 (7 ; 14)           | 10 (7 ; 14)           | $\chi^2(2) = 108.649^{***}$          | $\eta^2 = 0.012$ |

\*\*\*  $p < .001$ ; \*\*  $p < .01$ ; \*  $p < .05$ ;  $\phi_c$  = Cramer's V;  $\eta^2$  = Eta squared

<sup>1</sup> Median, 25th percentile and 75th percentile (Tukey's hinges)

**Table S3.** Bivariate analyses for tobacco use (N=2,653)

| Variable                              | Values                        | Increase<br>N=739     | No change<br>N=864    | Decrease<br>N=1,050   | Chi-square                           | Effect<br>size   |
|---------------------------------------|-------------------------------|-----------------------|-----------------------|-----------------------|--------------------------------------|------------------|
| Sex                                   | Male                          | 34%                   | 37%                   | 32%                   | $\chi^2(2) = 5.043$ ,<br>$p = 0.080$ | $\phi_c = 0.044$ |
|                                       | Female                        | 66%                   | 63%                   | 68%                   |                                      |                  |
| Age <sup>1</sup>                      | 17-24                         | 21 (20 ; 23)          | 20 (19 ; 22)          | 21 (19 ; 22)          | $\chi^2(2) = 20.147^{***}$           | $\eta^2 = 0.008$ |
| Parent(s) HE degree                   | No                            | 32%                   | 19%                   | 21%                   | $\chi^2(2) = 47.257^{***}$           | $\phi_c = 0.133$ |
|                                       | Yes                           | 68%                   | 81%                   | 79%                   |                                      |                  |
| Study year                            | First-year                    | 24%                   | 23%                   | 23%                   | $\chi^2(2) = 0.097$ ,<br>$p = 0.953$ | $\phi_c = 0.006$ |
|                                       | Higher year                   | 76%                   | 77%                   | 77%                   |                                      |                  |
| Institution type                      | College of applied sciences   | 45%                   | 32%                   | 42%                   | $\chi^2(2) = 33.544^{***}$           | $\phi_c = 0.112$ |
|                                       | University                    | 55%                   | 68%                   | 58%                   |                                      |                  |
| Health condition                      | No                            | 85%                   | 90%                   | 90%                   | $\chi^2(2) = 12.597^{**}$            | $\phi_c = 0.069$ |
|                                       | Underlying condition          | 15%                   | 10%                   | 10%                   |                                      |                  |
| COVID-19 diagnosis                    | No                            | 82%                   | 88%                   | 86%                   | $\chi^2(2) = 10.757^{**}$            | $\phi_c = 0.064$ |
|                                       | (Un)confirmed probably or yes | 18%                   | 12%                   | 14%                   |                                      |                  |
| Living situation                      | Parental home                 | 44%                   | 42%                   | 44%                   | $\chi^2(6) = 112.901^{***}$          | $\phi_c = 0.146$ |
|                                       | Moved back to parental home   | 22%                   | 37%                   | 40%                   |                                      |                  |
|                                       | Outside of parental home      | 31%                   | 18%                   | 13%                   |                                      |                  |
|                                       | Moved away from parental home | 3%                    | 3%                    | 3%                    |                                      |                  |
| Financial situation                   | Decrease                      | 45%                   | 29%                   | 38%                   | $\chi^2(4) = 66.208^{***}$           | $\phi_c = 0.112$ |
|                                       | No change                     | 49%                   | 65%                   | 52%                   |                                      |                  |
|                                       | Increase                      | 6%                    | 6%                    | 10%                   |                                      |                  |
| Social activity <sup>1</sup>          | 0-9                           | 5 (4 ; 6)             | 5 (4 ; 6)             | 5 (4 ; 6)             | $\chi^2(2) = 0.153$ ,<br>$p = 0.926$ | $\eta^2 = 0.000$ |
| Perceived threat <sup>1</sup>         | 0-10                          | 5.83<br>(4.67 ; 7.17) | 5.33<br>(4.00 ; 6.67) | 5.67<br>(4.50 ; 7)    | $\chi^2(2) = 35.011^{***}$           | $\eta^2 = 0.013$ |
| Academic stress <sup>1</sup>          | 0-4                           | 3.25<br>(2.75 ; 3.75) | 3.00<br>(2.25 ; 3.50) | 3.25<br>(2.50 ; 3.75) | $\chi^2(2) = 49.380^{***}$           | $\eta^2 = 0.016$ |
| Academic dissatisfaction <sup>1</sup> | 0-4                           | 2.25<br>(1.50 ; 2.75) | 2.00<br>(1.50 ; 2.50) | 2.00<br>(1.50 ; 2.50) | $\chi^2(2) = 15.784^{***}$           | $\eta^2 = 0.005$ |
| Depressive symptoms <sup>1</sup>      | 0-24                          | 13 (9 ; 17)           | 11 (7 ; 15)           | 11 (8 ; 15)           | $\chi^2(2) = 61.770^{***}$           | $\eta^2 = 0.024$ |

\*\*\*  $p < .001$ ; \*\*  $p < .01$ ; \*  $p < .05$ ;  $\phi_c$  = Cramer's V;  $\eta^2$  = Eta squared<sup>1</sup> Median, 25th percentile and 75th percentile (Tukey's hinges)

**Table S4.** Bivariate analyses for cannabis use (N=1,804)

| Variable                              | Values                        | Increase<br>N=411     | No change<br>N=334    | Decrease<br>N=1,059   | Chi-square                           | Effect<br>size   |
|---------------------------------------|-------------------------------|-----------------------|-----------------------|-----------------------|--------------------------------------|------------------|
| Sex                                   | Male                          | 35%                   | 44%                   | 42%                   | $\chi^2(2) = 8.100^*$                | $\phi_c = 0.067$ |
|                                       | Female                        | 65%                   | 56%                   | 58%                   |                                      |                  |
| Age <sup>1</sup>                      | 17-24                         | 21 (20 ; 22.50)       | 21 (20 ; 22)          | 20 (19 ; 22)          | $\chi^2(2) = 37.161^{***}$           | $\eta^2 = 0.021$ |
| Parent(s) HE degree                   | No                            | 28%                   | 24%                   | 21%                   | $\chi^2(2) = 7.768^*$                | $\phi_c = 0.066$ |
|                                       | Yes                           | 72%                   | 76%                   | 79%                   |                                      |                  |
| Study year                            | First-year                    | 21%                   | 23%                   | 24%                   | $\chi^2(2) = 2.372$ ,<br>$p = 0.305$ | $\phi_c = 0.036$ |
|                                       | Higher year                   | 79%                   | 77%                   | 76%                   |                                      |                  |
| Institution type                      | College of applied sciences   | 41%                   | 45%                   | 34%                   | $\chi^2(2) = 14.089^{***}$           | $\phi_c = 0.088$ |
|                                       | University                    | 59%                   | 55%                   | 66%                   |                                      |                  |
| Health condition                      | No                            | 89%                   | 89%                   | 89%                   | $\chi^2(2) = 0.008$ ,<br>$p = 0.996$ | $\phi_c = 0.002$ |
|                                       | Underlying condition          | 11%                   | 11%                   | 11%                   |                                      |                  |
| COVID-19 diagnosis                    | No                            | 83%                   | 85%                   | 85%                   | $\chi^2(2) = 1.164$ ,<br>$p = 0.559$ | $\phi_c = 0.025$ |
|                                       | (Un)confirmed probably or yes | 17%                   | 15%                   | 15%                   |                                      |                  |
| Living situation                      | Parental home                 | 36%                   | 40%                   | 40%                   | $\chi^2(6) = 176.163^{***}$          | $\phi_c = 0.221$ |
|                                       | Moved back to parental home   | 22%                   | 22%                   | 45%                   |                                      |                  |
|                                       | Outside of parental home      | 37%                   | 34%                   | 14%                   |                                      |                  |
|                                       | Moved away from parental home | 5%                    | 5%                    | 1%                    |                                      |                  |
| Financial situation                   | Decrease                      | 45%                   | 35%                   | 30%                   | $\chi^2(4) = 39.551^{***}$           | $\phi_c = 0.105$ |
|                                       | No change                     | 51%                   | 55%                   | 60%                   |                                      |                  |
|                                       | Increase                      | 4%                    | 10%                   | 10%                   |                                      |                  |
| Social activity <sup>1</sup>          | 0-9                           | 5 (4 ; 6)             | 5 (4 ; 6)             | 5 (4 ; 6)             | $\chi^2(2) = 4.793$ ,<br>$p = 0.091$ | $\eta^2 = 0.003$ |
| Perceived threat <sup>1</sup>         | 0-10                          | 5.50<br>(4.50 ; 7.00) | 5.42<br>(4.00 ; 6.50) | 5.17<br>(4.00 ; 6.33) | $\chi^2(2) = 18.739^{***}$           | $\eta^2 = 0.011$ |
| Academic stress <sup>1</sup>          | 0-4                           | 3.25<br>(2.50 ; 3.75) | 3.00<br>(2.50 ; 3.75) | 3.00<br>(2.50 ; 3.75) | $\chi^2(2) = 7.707^*$                | $\eta^2 = 0.004$ |
| Academic dissatisfaction <sup>1</sup> | 0-4                           | 2.00<br>(1.50 ; 2.75) | 2.00<br>(1.50 ; 2.50) | 2.00<br>(1.50 ; 2.50) | $\chi^2(2) = 1.916$ ,<br>$p = 0.384$ | $\eta^2 = 0.001$ |
| Depressive symptoms <sup>1</sup>      | 0-24                          | 13<br>(9 ; 17)        | 11<br>(7 ; 15)        | 12<br>(8 ; 15)        | $\chi^2(2) = 20.411^{***}$           | $\eta^2 = 0.012$ |

\*\*\*  $p < .001$ ; \*\*  $p < .01$ ; \*  $p < .05$ ;  $\phi_c$  = Cramer's V;  $\eta^2$  = Eta squared<sup>1</sup> Median, 25th percentile and 75th percentile (Tukey's hinges)
