# Supplementary material for: Substance Use among Belgian Higher Education Students before and during the First Wave of the COVID-19 Pandemic
Source: Int J Environ Res Public Health. 2022 Apr 5;19(7):4348. doi: 10.3390/ijerph19074348 (PMC8998911; doi:10.3390/ijerph19074348)
Supplement: Supplementary file 1 [file ijerph-19-04348-s001.zip]

Archive with 4 entries (4 files):
- Supplementary_1_bivariate_analyses.pdf
- Supplementary_2_missing_sensitivity_analyses.pdf
- Supplementary_3_assumption_testing.pdf
- Supplementary_4_control_analyses.pdf
